# Supplementary material for: Synthesis of Novel 2-(Cyclopentylamino)thiazol-4(5H)-one Derivatives with Potential Anticancer, Antioxidant, and 11β-HSD Inhibitory Activities
Source: MDPI journal article supplement (doi:10.3390/ijms24087252), 2023-04-14
Supplement: s1 [file s1]

## Supplementary information

# Novel 2-(cyclopentylamino)thiazol-4(5*H*)-one derivatives – synthesis and screening for their anticancer, antioxidant and 11 $\beta$ -HSD inhibitory activities

Szymon Baumgart<sup>1,\*</sup>, Daria Kupczyk<sup>2</sup>, Aneta Archęła<sup>3</sup>, Oliwia Koszła<sup>3</sup>, Przemysław Sołek<sup>3</sup>, Wojciech Płaziński<sup>3,4</sup>, Anita Płazińska<sup>3</sup> and Renata Studzińska<sup>1,\*</sup>

<sup>1</sup> Nicolaus Copernicus University in Toruń, Collegium Medicum in Bydgoszcz, Faculty of Pharmacy, Department of Organic Chemistry, 2 Jurasza Str., 85–089 Bydgoszcz, Poland; sz.baumgart@cm.umk.pl, rstud@cm.umk.pl

<sup>2</sup> Nicolaus Copernicus University in Toruń, Collegium Medicum in Bydgoszcz, Faculty of Medicine, Department of Medical Biology and Biochemistry, 24 Karłowicza Str., 85–092 Bydgoszcz, Poland; dariak@cm.umk.pl

<sup>3</sup> Department of Biopharmacy, Medical University of Lublin, 4a Chodźki Str., 20-093 Lublin, Poland; anita.plazinska@umlub.pl, aneta.banach94@o2.pl, koszlaoliwia@gmail.com, pp.solek@gmail.com

<sup>4</sup> J. Haber Institute of Catalysis and Surface Chemistry, Polish Academy of Sciences, 8 Niezapominajek Str., 30-239 Cracow, Poland; wojtek\_plazinski@tlen.pl

\* Correspondence: rstud@cm.umk.pl, sz.baumgart@cm.umk.pl

## S1. $^1\text{H}$ NMR spectra of compounds 3a – 3i

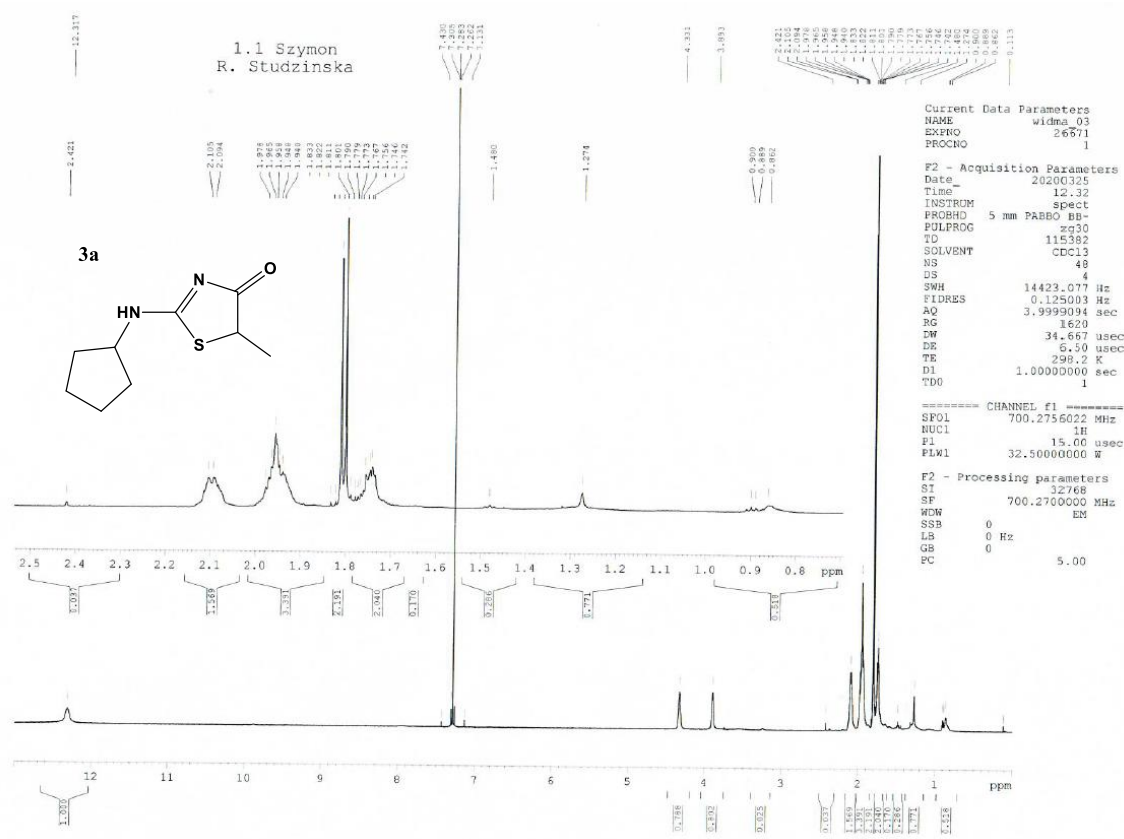

Figure S1.  $^1\text{H}$  NMR spectra of compound 3a

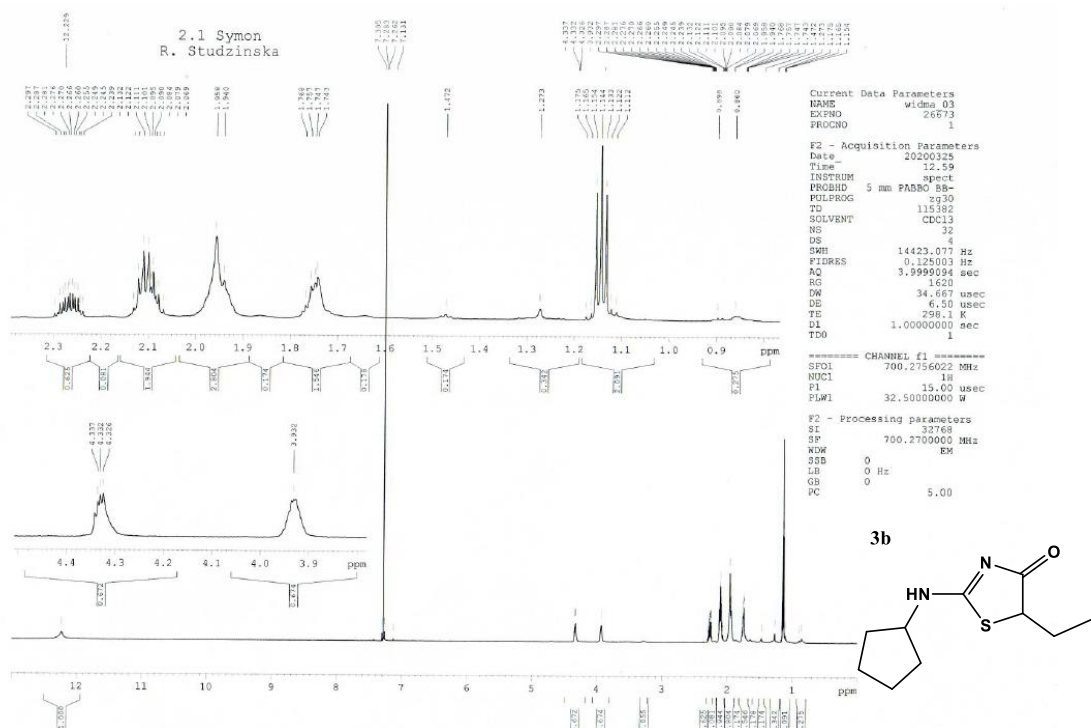

Figure S2.  $^1\text{H}$  NMR spectra of compound 3b



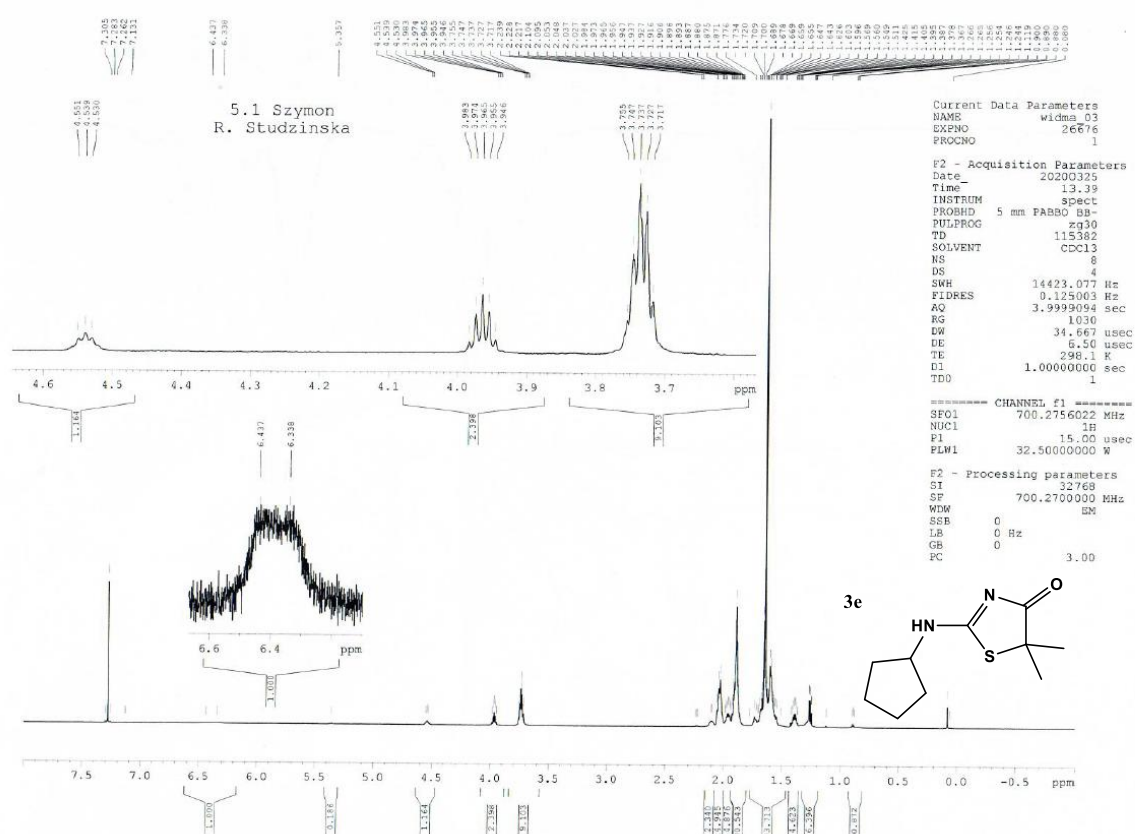

Figure S5.  $^1\text{H}$  NMR spectra of compound 3e

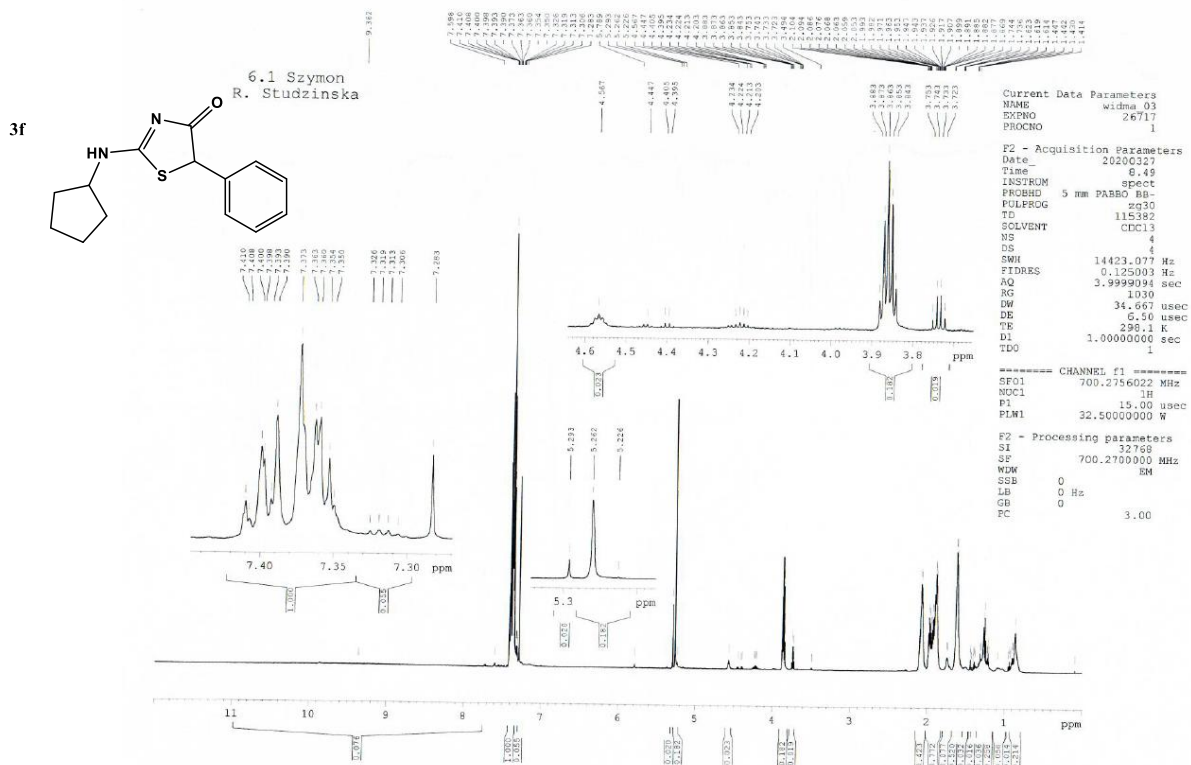

Figure S6.  $^1\text{H}$  NMR spectra of compound 3f

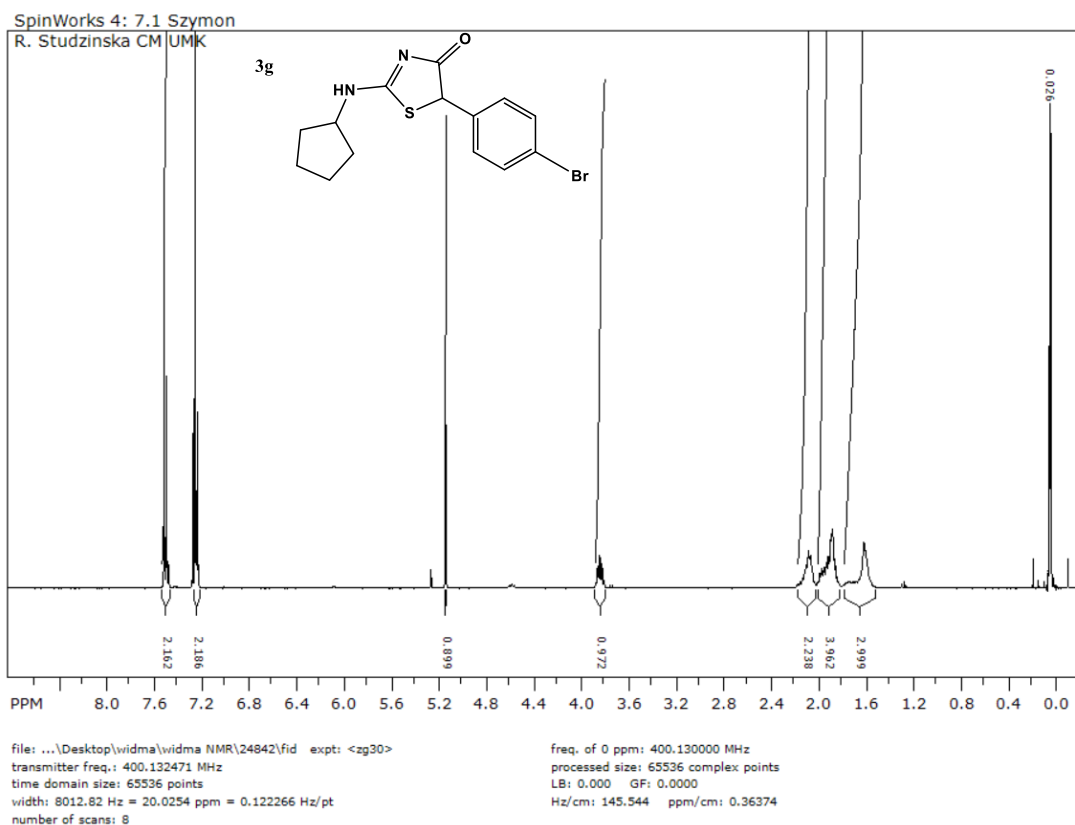

**Figure S7.**  $^1\text{H}$  NMR spectra of compound **3g**

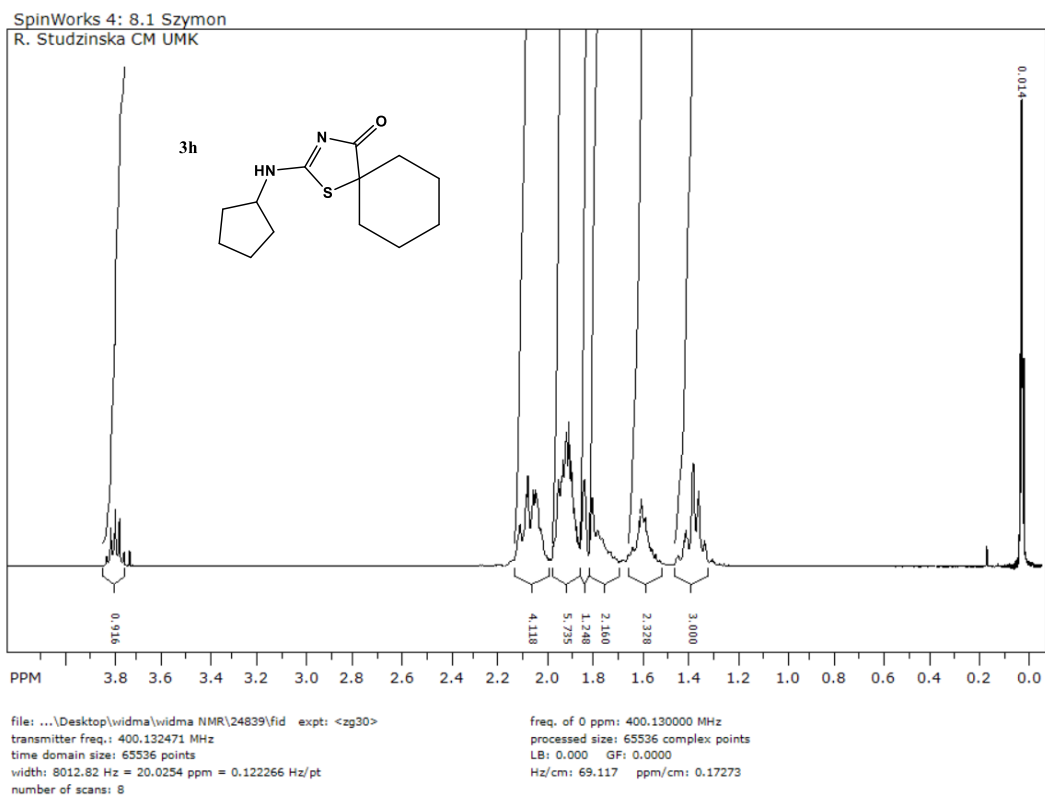

**Figure S8.**  $^1\text{H}$  NMR spectra of compound **3h**

SpinWorks 4: 9.1 Szymon

R. Studzinska CM UMK

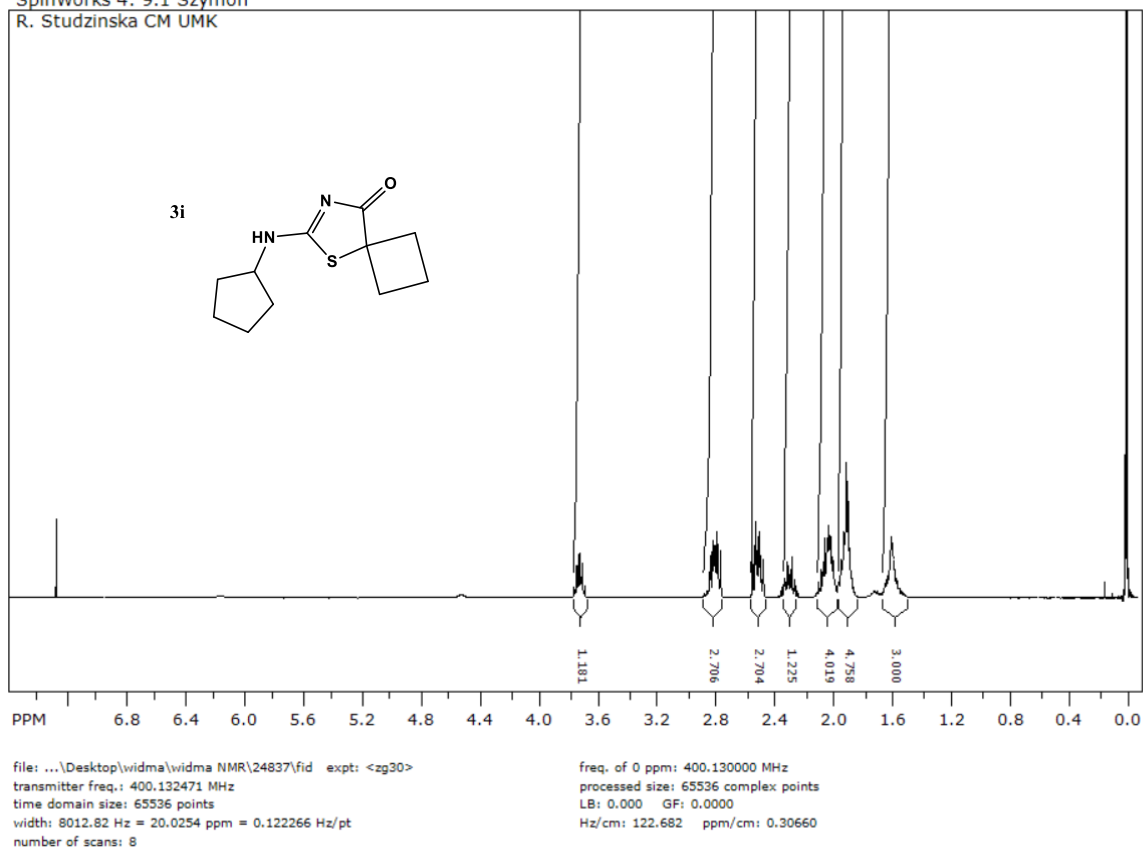

**Figure S9.**  $^1\text{H}$  NMR spectra of compound **3i**

## S2. $^{13}\text{C}$ NMR spectra of compounds 3a – 3i

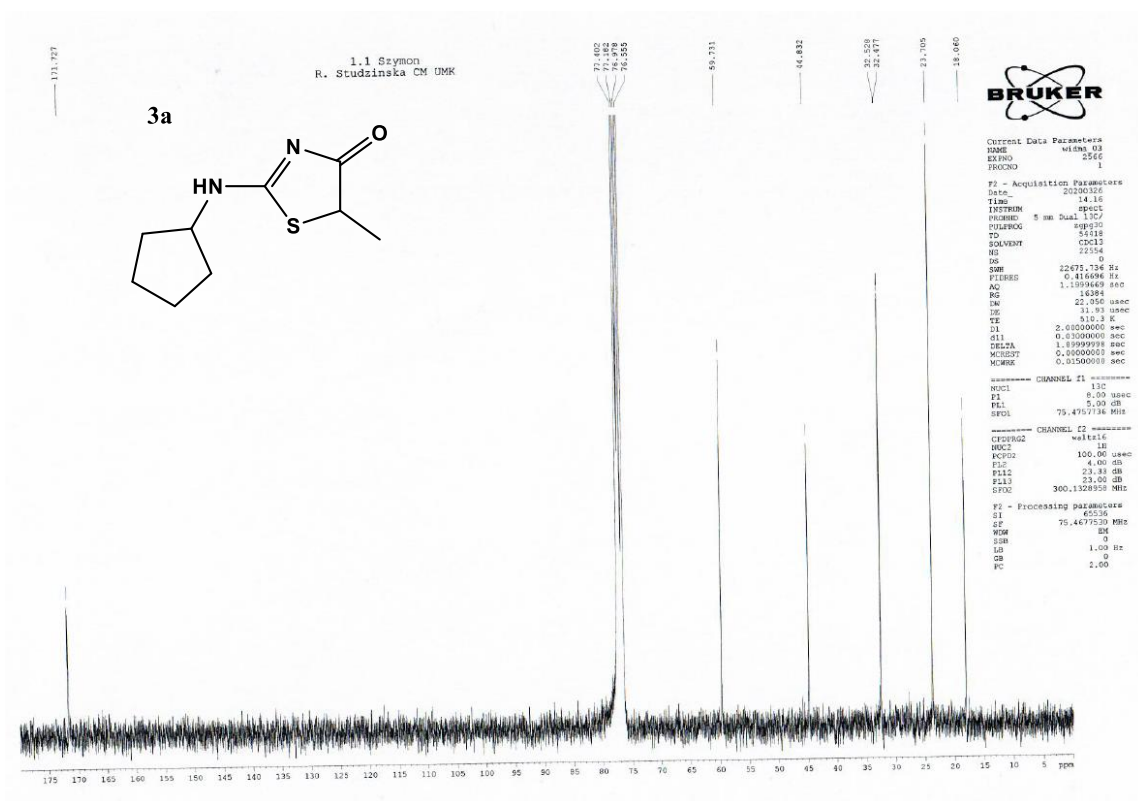

Figure S10.  $^{13}\text{C}$  NMR spectra of compounds 3a

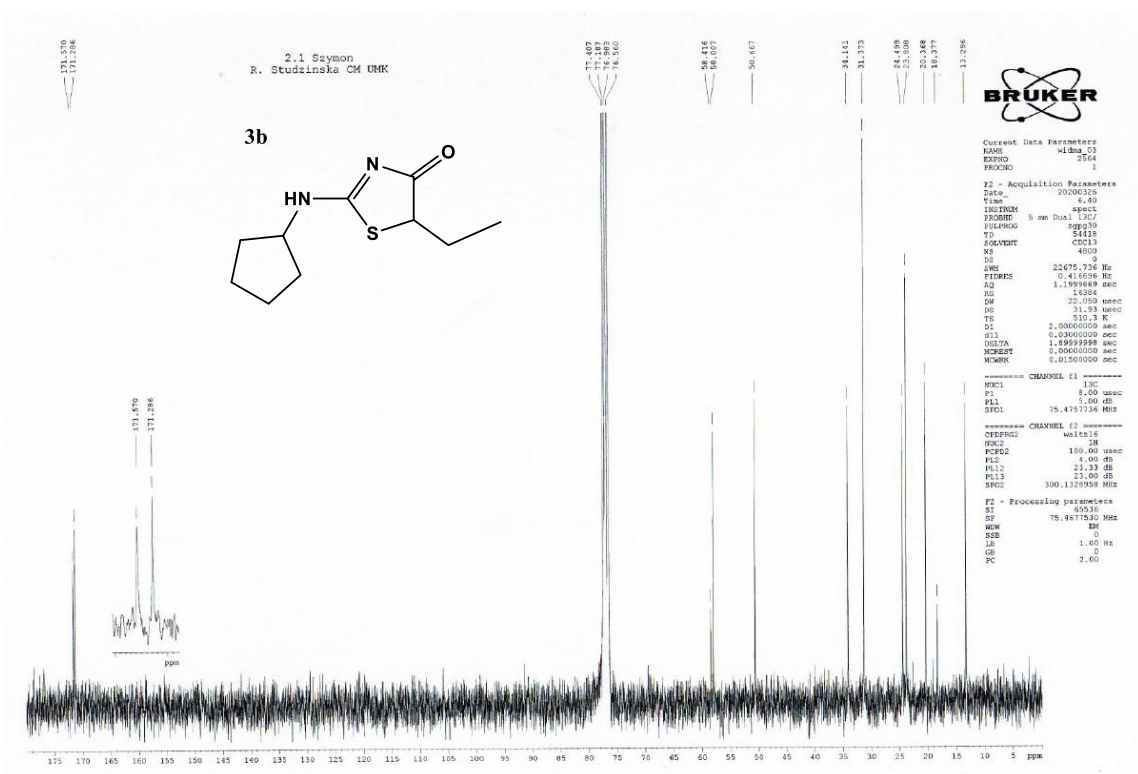

Figure S11.  $^{13}\text{C}$  NMR spectra of compound 3b

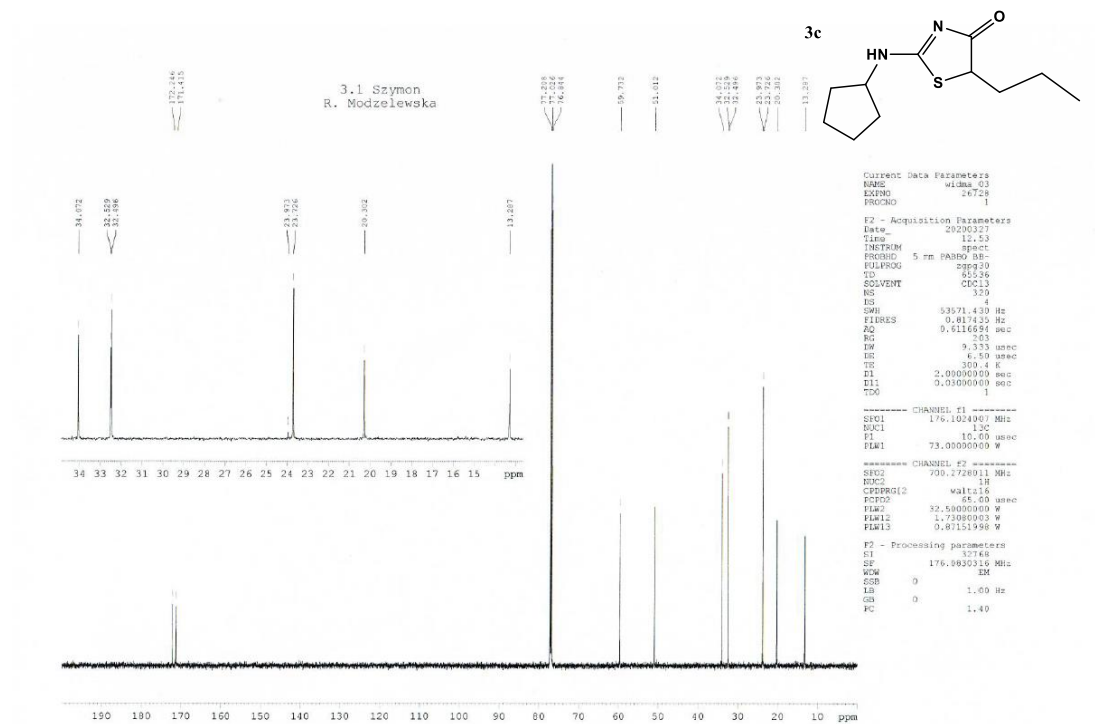

Figure S12. <sup>13</sup>C NMR spectra of compound 3c

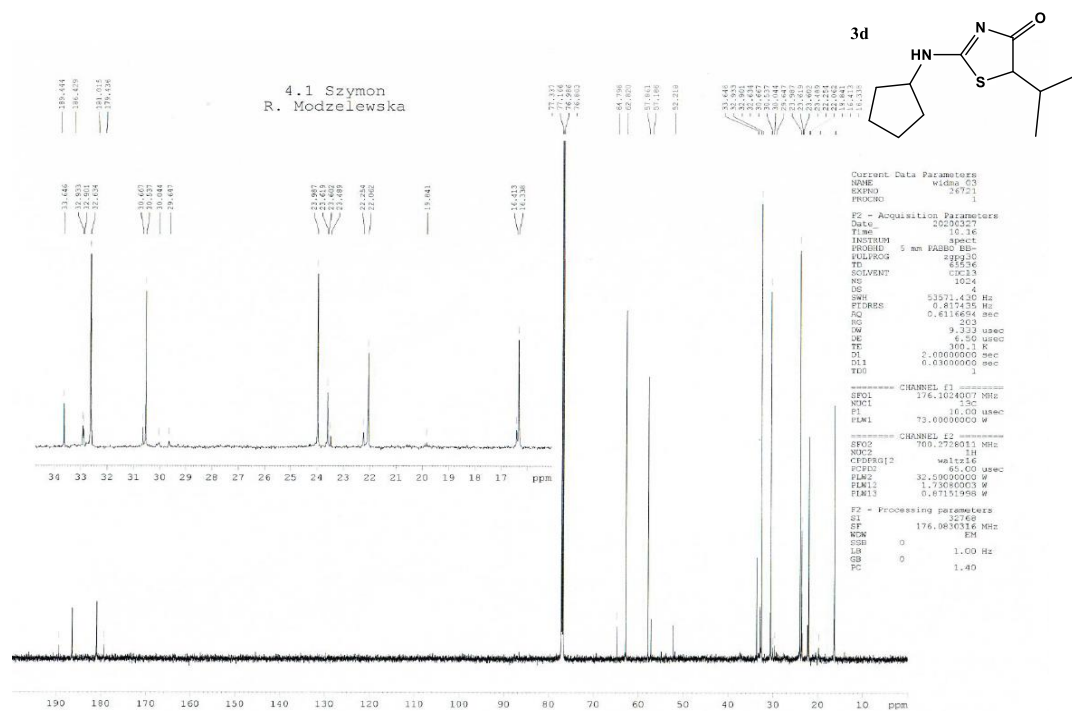

Figure S13. <sup>13</sup>C NMR spectra of compound 3d

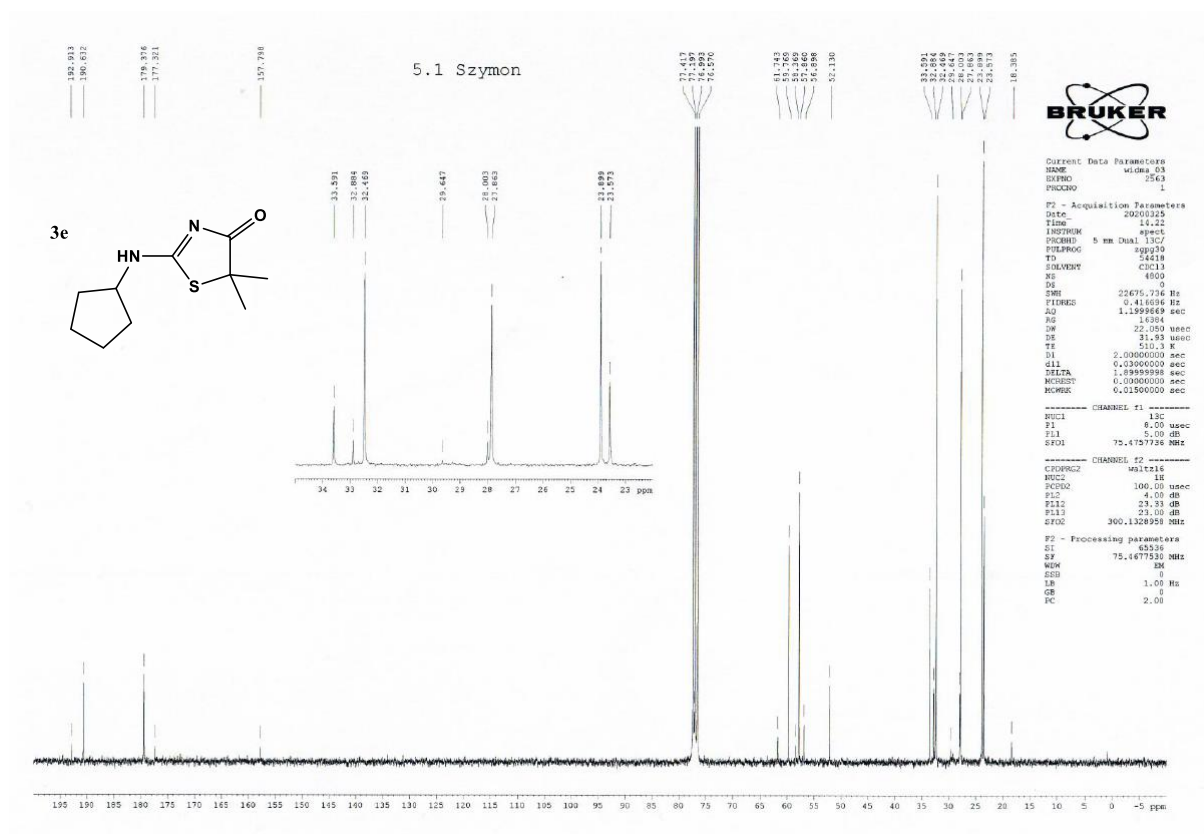

Figure S14. <sup>13</sup>C NMR spectra of compounds 3

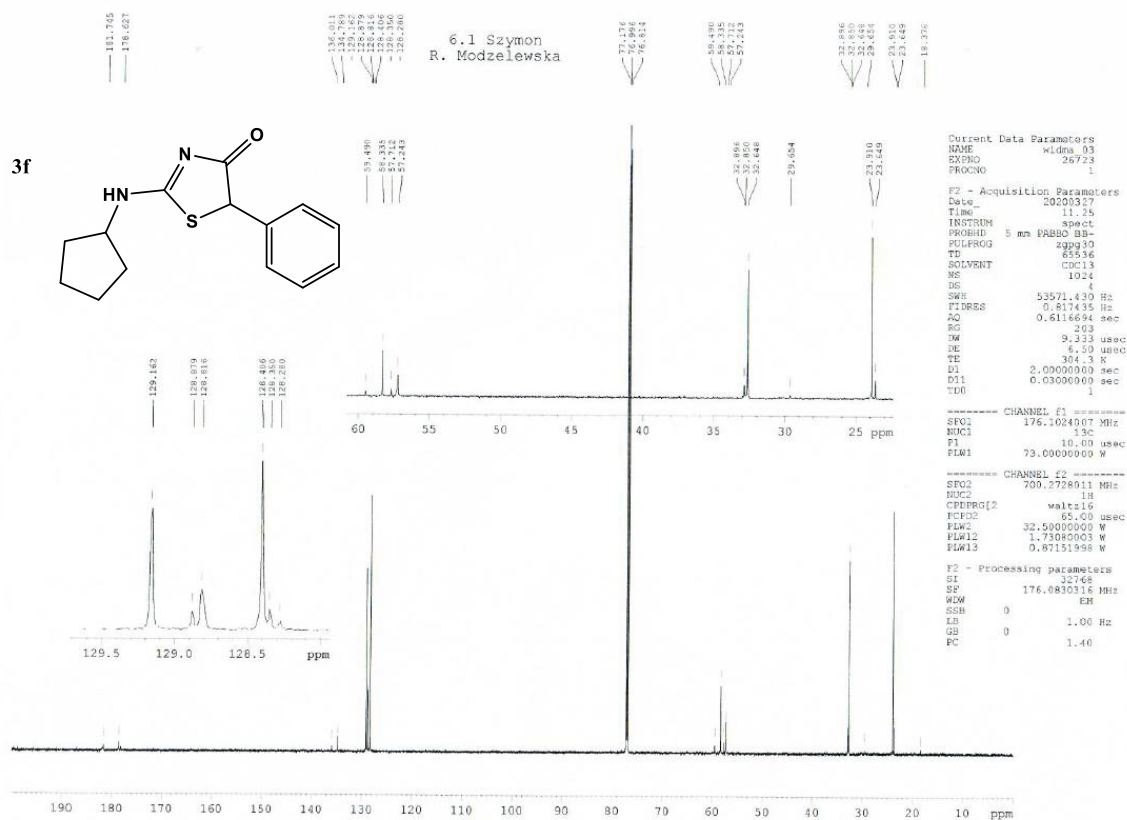

Figure S15. <sup>13</sup>C NMR spectra of compound 3f

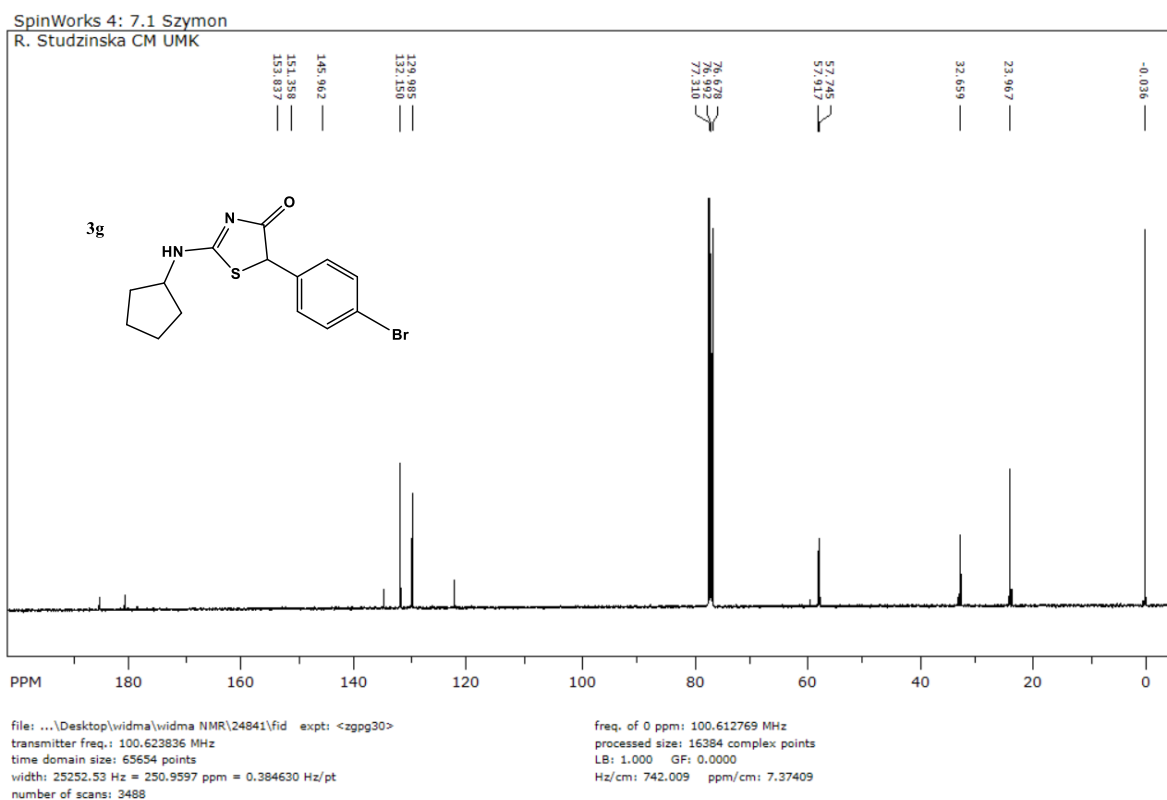

**Figure S16.**  $^{13}\text{C}$  NMR spectra of compound **3g**

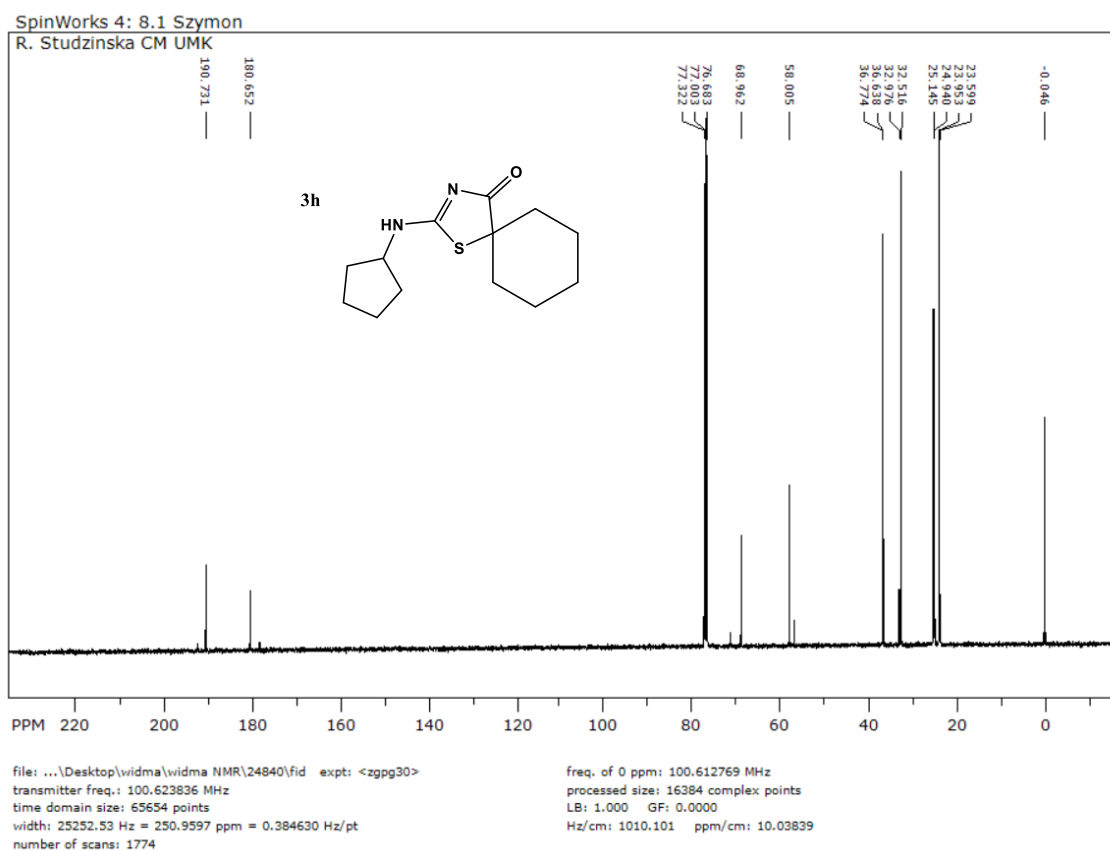

**Figure S17.**  $^{13}\text{C}$  NMR spectra of compound **3h**

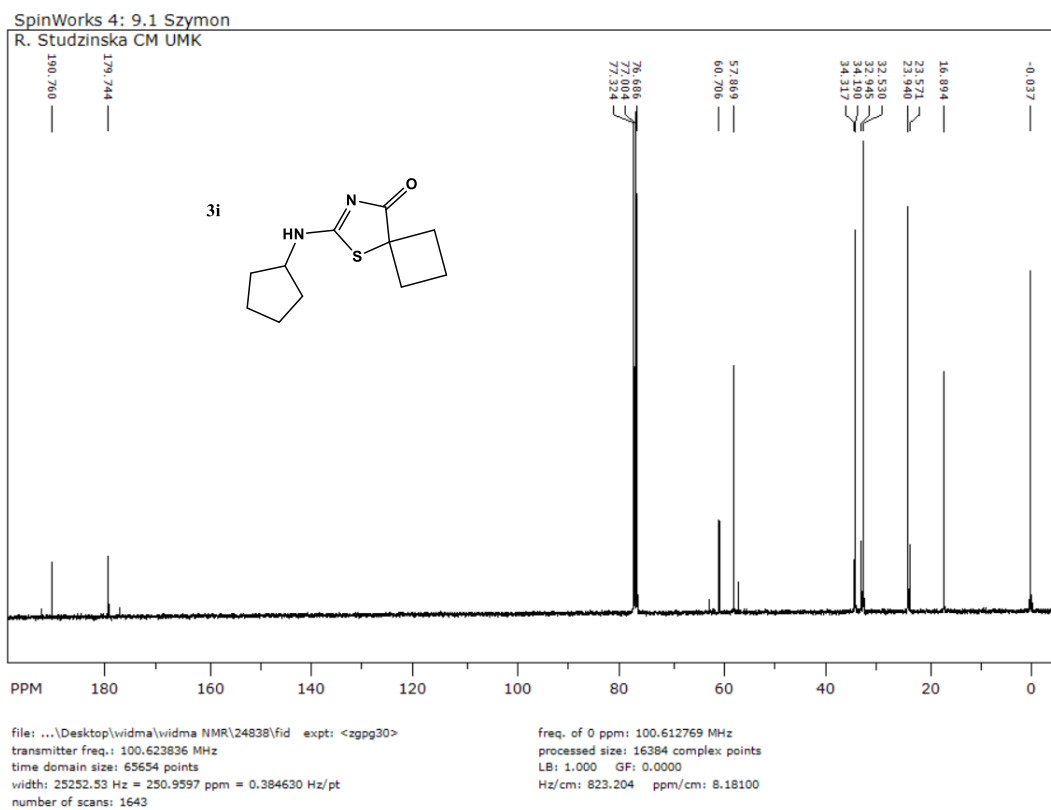

Figure S18.  $^{13}\text{C}$  NMR spectra of compound 3i

### S3. HRMS spectra of compounds 3a – 3i

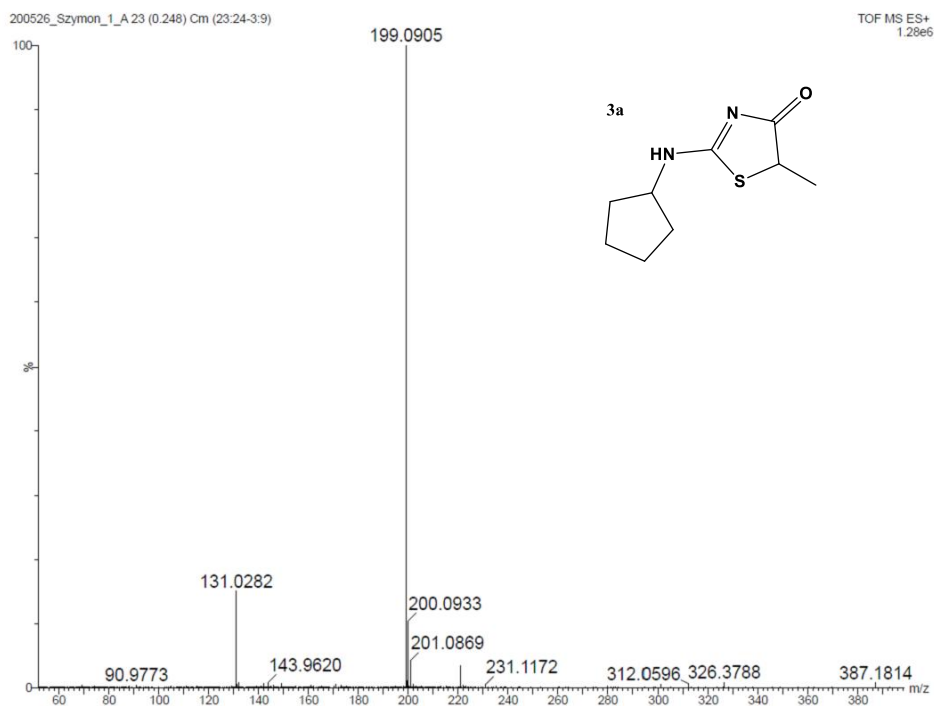

Figure S19. Mass spectrum of compound 3a

## Elemental Composition Report

Page 1

### Single Mass Analysis

Tolerance = 10.0 PPM / DBE: min = -1.5, max = 70.0

Element prediction: Off

Number of isotope peaks used for i-FIT = 9

Monoisotopic Mass, Even Electron Ions

37 formula(e) evaluated with 1 results within limits (all results (up to 1000) for each mass)

Elements Used:

C: 0-40 H: 0-40 N: 0-2 O: 0-1 S: 0-1

200526\_Szymon\_2A 12 (0.143) Cm (10:12-3:8)

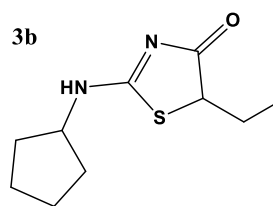

TOF MS ES+  
6.06e+006

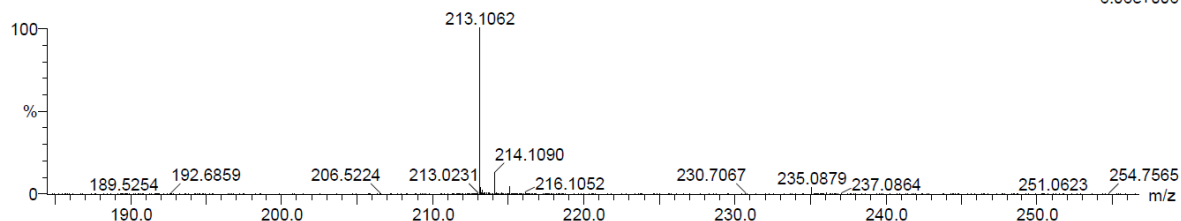

Minimum: -1.5  
Maximum: 5.0 10.0 70.0

| Mass     | Calc. Mass | mDa | PPM | DBE | i-FIT  | Norm | Conf(%) | Formula        |
|----------|------------|-----|-----|-----|--------|------|---------|----------------|
| 213.1062 | 213.1062   | 0.0 | 0.0 | 3.5 | 1191.5 | n/a  | n/a     | C10 H17 N2 O S |

Figure S20. HRMS spectra of compound 3b

## Elemental Composition Report

Page 1

### Single Mass Analysis

Tolerance = 10.0 PPM / DBE: min = -1.5, max = 70.0

Element prediction: Off

Number of isotope peaks used for i-FIT = 9

Monoisotopic Mass, Even Electron Ions

40 formula(e) evaluated with 1 results within limits (all results (up to 1000) for each mass)

Elements Used:

C: 0-40 H: 0-40 N: 0-2 O: 0-1 S: 0-1

200526\_Szymon\_3A 26 (0.285) Cm (26:32-3:8)

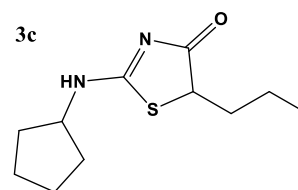

TOF MS ES+  
6.49e+006

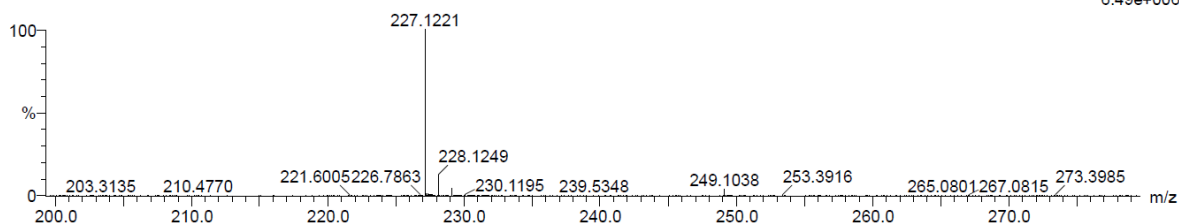

Minimum: -1.5  
Maximum: 5.0 10.0 70.0

| Mass     | Calc. Mass | mDa | PPM | DBE | i-FIT  | Norm | Conf(%) | Formula        |
|----------|------------|-----|-----|-----|--------|------|---------|----------------|
| 227.1221 | 227.1218   | 0.3 | 1.3 | 3.5 | 1214.3 | n/a  | n/a     | C11 H19 N2 O S |

Figure S21. HRMS spectra of compound 3c

## Elemental Composition Report

Page 1

### Single Mass Analysis

Tolerance = 10.0 PPM / DBE: min = -1.5, max = 70.0

Element prediction: Off

Number of isotope peaks used for i-FIT = 9

Monoisotopic Mass, Even Electron Ions

40 formula(e) evaluated with 1 results within limits (all results (up to 1000) for each mass)

Elements Used:

C: 0-40 H: 0-40 N: 0-2 O: 0-1 S: 0-1

200526\_Szymon\_4B 30 (0.320) Cm (30:39-2:8)

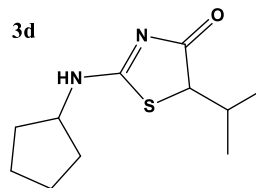

TOF MS ES+  
1.55e+007

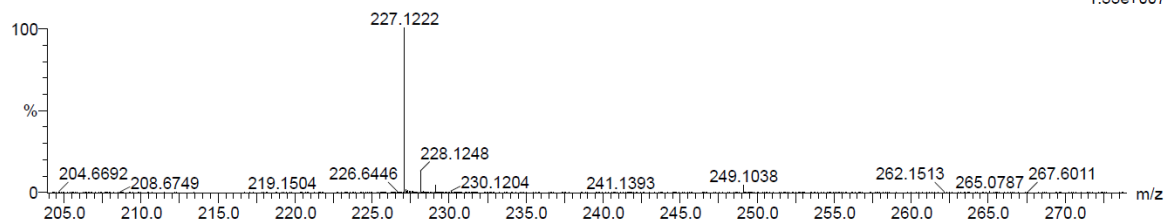

Minimum: -1.5  
Maximum: 5.0 10.0 70.0

| Mass     | Calc. Mass | mDa | PPM | DBE | i-FIT  | Norm | Conf(%) | Formula        |
|----------|------------|-----|-----|-----|--------|------|---------|----------------|
| 227.1222 | 227.1218   | 0.4 | 1.8 | 3.5 | 1458.8 | n/a  | n/a     | C11 H19 N2 O S |

Figure S22. HRMS spectra of compound 3d

## Elemental Composition Report

Page 1

### Single Mass Analysis

Tolerance = 10.0 PPM / DBE: min = -1.5, max = 70.0

Element prediction: Off

Number of isotope peaks used for i-FIT = 9

Monoisotopic Mass, Even Electron Ions

37 formula(e) evaluated with 1 results within limits (all results (up to 1000) for each mass)

Elements Used:

C: 0-40 H: 0-40 N: 0-2 O: 0-1 S: 0-1

200526\_Szymon\_5A 32 (0.337) Cm (31:37-2:10)

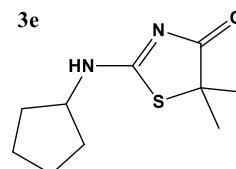

TOF MS ES+  
9.45e+006

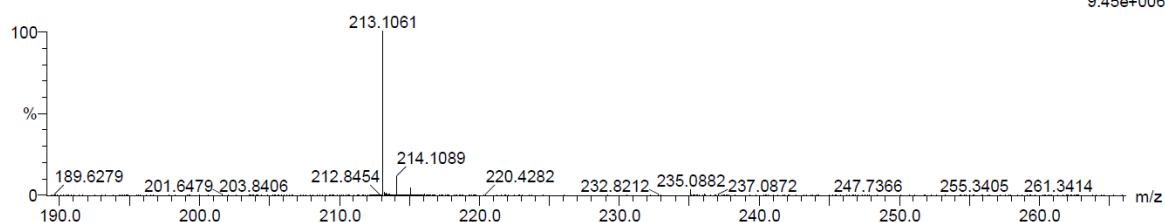

Minimum: -1.5  
Maximum: 5.0 10.0 70.0

| Mass     | Calc. Mass | mDa  | PPM  | DBE | i-FIT  | Norm | Conf(%) | Formula        |
|----------|------------|------|------|-----|--------|------|---------|----------------|
| 213.1061 | 213.1062   | -0.1 | -0.5 | 3.5 | 1438.4 | n/a  | n/a     | C10 H17 N2 O S |

Figure S23. HRMS spectra of compound 3e

## Elemental Composition Report

Page 1

### Single Mass Analysis

Tolerance = 10.0 PPM / DBE: min = -1.5, max = 70.0

Element prediction: Off

Number of isotope peaks used for i-FIT = 9

Monoisotopic Mass, Even Electron Ions

26 formula(e) evaluated with 1 results within limits (all results (up to 1000) for each mass)

Elements Used:

C: 0-20 H: 0-25 N: 0-2 O: 0-1 S: 0-1

200526\_Szymon\_6A 57 (0.597) Cm (57:65-3:8)

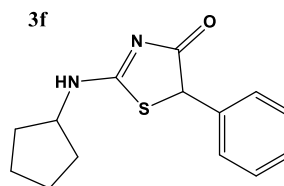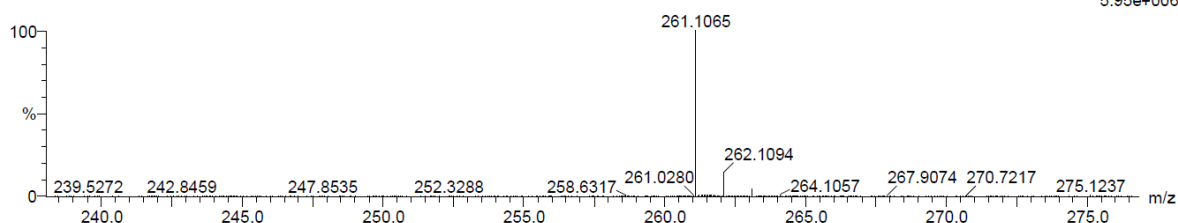

TOF MS ES+  
5.95e+006

Minimum: -1.5  
Maximum: 5.0 10.0 70.0

| Mass     | Calc. Mass | mDa | PPM | DBE | i-FIT  | Norm | Conf(%) | Formula        |
|----------|------------|-----|-----|-----|--------|------|---------|----------------|
| 261.1065 | 261.1062   | 0.3 | 1.1 | 7.5 | 1603.1 | n/a  | n/a     | C14 H17 N2 O S |

Figure S24. HRMS spectra of compound 3f

## Elemental Composition Report

Page 1

### Single Mass Analysis

Tolerance = 5.0 PPM / DBE: min = -1.5, max = 80.0

Element prediction: Off

Number of isotope peaks used for i-FIT = 9

Monoisotopic Mass, Even Electron Ions

518 formula(e) evaluated with 2 results within limits (all results (up to 1000) for each mass)

Elements Used:

C: 0-60 H: 0-70 N: 0-6 O: 0-4 S: 0-1 Br: 0-1

210318\_7\_1\_SzymonA 18 (0.205) Cm (18:30-4:8)

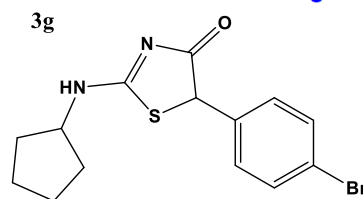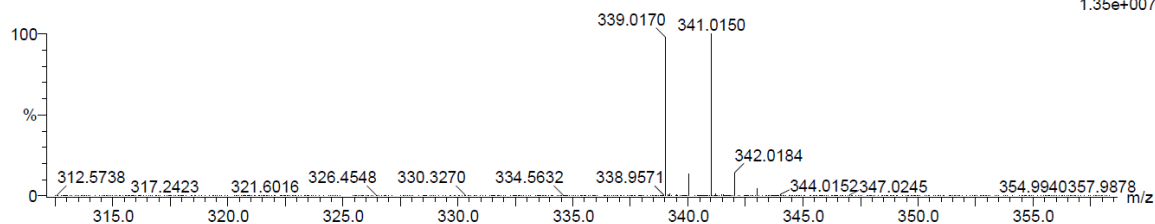

TOF MS ES+  
1.35e+007

Minimum: -1.5  
Maximum: 5.0 5.0 80.0

| Mass     | Calc. Mass | mDa | PPM | DBE  | i-FIT  | Norm   | Conf(%) | Formula           |
|----------|------------|-----|-----|------|--------|--------|---------|-------------------|
| 339.0170 | 339.0167   | 0.3 | 0.9 | 7.5  | 1318.5 | 0.000  | 100.00  | C14 H16 N2 O S Br |
|          | 339.0154   | 1.6 | 4.7 | 19.5 | 1346.0 | 27.545 | 0.00    | C18 H3 N4 O4      |

Figure S25. HRMS spectra of compound 3g

## Elemental Composition Report

Page 1

### Single Mass Analysis

Tolerance = 5.0 PPM / DBE: min = -1.5, max = 80.0

Element prediction: Off

Number of isotope peaks used for i-FIT = 9

Monoisotopic Mass, Even Electron Ions

224 formula(e) evaluated with 1 results within limits (all results (up to 1000) for each mass)

Elements Used:

C: 0-60 H: 0-70 N: 0-6 O: 0-4 S: 0-1

210318\_8\_1\_SzymonA 28 (0.303) Cm (28:40)

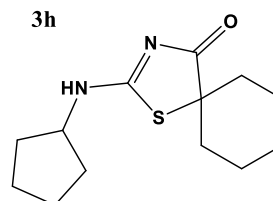

TOF MS ES+  
2.92e+007

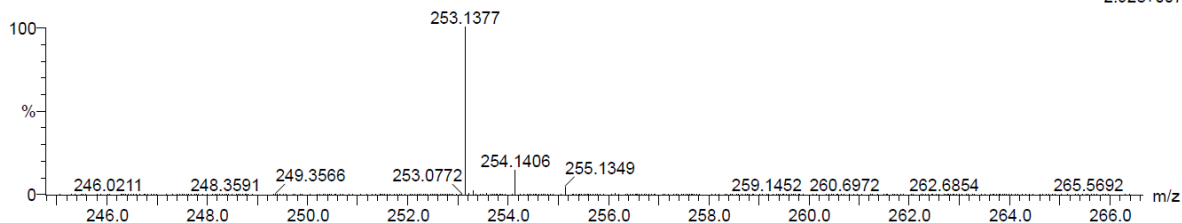

Minimum: -1.5  
Maximum: 5.0 5.0 80.0

| Mass     | Calc. Mass | mDa | PPM | DBE | i-FIT  | Norm | Conf(%) | Formula        |
|----------|------------|-----|-----|-----|--------|------|---------|----------------|
| 253.1377 | 253.1375   | 0.2 | 0.8 | 4.5 | 1308.6 | n/a  | n/a     | C13 H21 N2 O S |

Figure S26. HRMS spectra of compound 3h

## Elemental Composition Report

Page 1

### Single Mass Analysis

Tolerance = 5.0 PPM / DBE: min = -1.5, max = 80.0

Element prediction: Off

Number of isotope peaks used for i-FIT = 9

Monoisotopic Mass, Even Electron Ions

200 formula(e) evaluated with 1 results within limits (all results (up to 1000) for each mass)

Elements Used:

C: 0-60 H: 0-70 N: 0-6 O: 0-4 S: 0-1

210318\_9\_1\_SzymonA 21 (0.231) Cm (21:36)

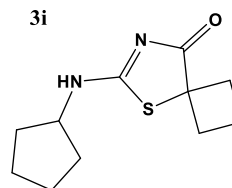

TOF MS ES+  
3.32e+007

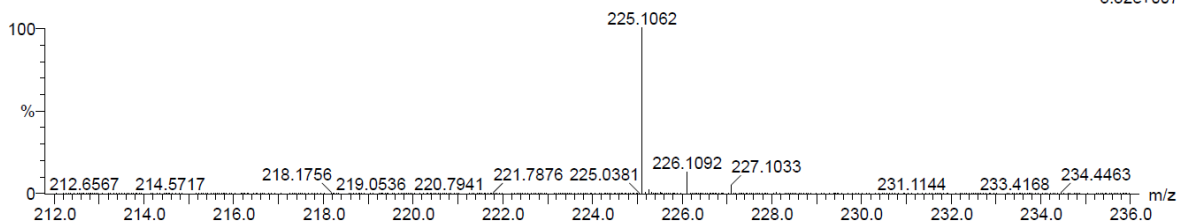

Minimum: -1.5  
Maximum: 5.0 5.0 80.0

| Mass     | Calc. Mass | mDa | PPM | DBE | i-FIT  | Norm | Conf(%) | Formula        |
|----------|------------|-----|-----|-----|--------|------|---------|----------------|
| 225.1062 | 225.1062   | 0.0 | 0.0 | 4.5 | 1472.9 | n/a  | n/a     | C11 H17 N2 O S |

Figure S27. HRMS spectra of compound 3i

S4. Cell metabolic activity changes in normal and cancer cell lines treated with compounds **3a**  
– **3i** (numerical data to Fig.4 of manuscript)

| Compound 3a           |           |       |        |      |        |       |         |       |           |      |            |       |
|-----------------------|-----------|-------|--------|------|--------|-------|---------|-------|-----------|------|------------|-------|
| Concentration<br>[μM] | Cell line |       |        |      |        |       |         |       |           |      |            |       |
|                       | BJ        |       | Caco-2 |      | PANC-1 |       | U118-MG |       | SK-MEL-30 |      | MDA-MB-231 |       |
| <b>C</b>              | 100.0     | ±7.5  | 100.0  | ±9.8 | 100.0  | ±11.7 | 100.0   | ±10.1 | 100.0     | ±7.3 | 100.0      | ±7.0  |
| <b>10</b>             | 95.9      | ±15.0 | 86.2   | ±4.8 | 99.7   | ±14.5 | 110.8   | ±4.2  | 103.6     | ±4.6 | 104.8      | ±12.2 |
| <b>20</b>             | 98.4      | ±10.8 | 92.8   | ±6.7 | 103.5  | ±7.2  | 108.9   | ±3.5  | 102       | ±3.8 | 106.7      | ±7.5  |
| <b>50</b>             | 102.4     | ±5.2  | 82.6   | ±9.2 | 105.8  | ±6.8  | 113     | ±6.0  | 101.7     | ±3.9 | 103        | ±4.2  |
| <b>100</b>            | 111.5     | ±3.0  | 81.6   | ±6.6 | 107.1  | ±8.7  | 109.9   | ±4.5  | 106.2     | ±3.7 | 105        | ±10.6 |
| <b>200</b>            | 109.2     | ±4.5  | 76.9   | ±6.7 | 109.7  | ±8.1  | 110.5   | ±4.9  | 102.7     | ±3.1 | 104.4      | ±11.9 |
| <b>300</b>            | 109.2     | ±8.6  | 75.5   | ±8.8 | 105.6  | ±7.0  | 109.8   | ±6.5  | 100.8     | ±1.7 | 93.6       | ±9.8  |
| <b>500</b>            | 110.4     | ±15.3 | 66.8   | ±5.5 | 104.1  | ±5.9  | 104.8   | ±9.0  | 97.6      | ±1.6 | 89.8       | ±11.9 |

| Compound 3b           |           |       |        |      |        |       |         |      |           |       |            |       |
|-----------------------|-----------|-------|--------|------|--------|-------|---------|------|-----------|-------|------------|-------|
| Concentration<br>[μM] | Cell line |       |        |      |        |       |         |      |           |       |            |       |
|                       | BJ        |       | Caco-2 |      | PANC-1 |       | U118-MG |      | SK-MEL-30 |       | MDA-MB-231 |       |
| <b>C</b>              | 100.0     | ±4.0  | 100.0  | ±9.4 | 100.0  | ±16.0 | 100.0   | ±9.1 | 100.0     | ±8.7  | 100.0      | ±4.0  |
| <b>10</b>             | 97.9      | ±2.5  | 87.9   | ±3.9 | 102.7  | ±13.5 | 110.0   | ±5.6 | 93.7      | ±15.6 | 97.5       | ±9.2  |
| <b>20</b>             | 98.5      | ±4.2  | 87.3   | ±4.8 | 102.2  | ±10.9 | 107.2   | ±4.5 | 99.0      | ±13.8 | 97.8       | ±8.7  |
| <b>50</b>             | 102.1     | ±3.1  | 84.4   | ±3.6 | 107.1  | ±7.3  | 110.7   | ±6.4 | 97.4      | ±10.9 | 94.5       | ±5.2  |
| <b>100</b>            | 108.1     | ±5.1  | 79.8   | ±4.1 | 111.7  | ±6.7  | 112.9   | ±4.4 | 105.4     | ±2.4  | 95.3       | ±4.1  |
| <b>200</b>            | 110.5     | ±5.4  | 77.0   | ±5.0 | 113.3  | ±14.1 | 113.3   | ±6.8 | 100.9     | ±3.1  | 86.5       | ±2.8  |
| <b>300</b>            | 111.8     | ±8.7  | 73.2   | ±4.7 | 109.7  | ±10.3 | 112.5   | ±6.0 | 98.4      | ±2.8  | 75.3       | ±3.0  |
| <b>500</b>            | 110.8     | ±11,3 | 66,1   | ±4,2 | 105,1  | ±11,3 | 106,6   | ±7,1 | 93,8      | ±6,4  | 57,4       | ±16,5 |

| Compound 3c           |           |      |        |      |        |       |         |       |           |       |            |      |
|-----------------------|-----------|------|--------|------|--------|-------|---------|-------|-----------|-------|------------|------|
| Concentration<br>[μM] | Cell line |      |        |      |        |       |         |       |           |       |            |      |
|                       | BJ        |      | Caco-2 |      | PANC-1 |       | U118-MG |       | SK-MEL-30 |       | MDA-MB-231 |      |
| <b>C</b>              | 100.0     | ±7.3 | 100.0  | ±9.1 | 100.0  | ±12.3 | 100.0   | ±11.3 | 100.0     | ±4.7  | 100.0      | ±5.7 |
| <b>10</b>             | 98.2      | ±4.9 | 88.1   | ±5.2 | 107.8  | ±7.8  | 111.1   | ±4.0  | 100.6     | ±4.6  | 101.0      | ±4.1 |
| <b>20</b>             | 99.7      | ±6.7 | 86.6   | ±3.9 | 105.6  | ±5.4  | 110.2   | ±3.3  | 102.0     | ±4.8  | 102.3      | ±3.4 |
| <b>50</b>             | 102.1     | ±6.2 | 87.6   | ±4.4 | 111.5  | ±9.1  | 110.2   | ±3.4  | 100.8     | ±4.1  | 99.1       | ±4.0 |
| <b>100</b>            | 107.6     | ±3.4 | 82.0   | ±5.2 | 114.3  | ±8.0  | 113.9   | ±3.1  | 101.0     | ±3.2  | 97.4       | ±2.1 |
| <b>200</b>            | 112.5     | ±9.9 | 86.1   | ±6.0 | 115.9  | ±5.5  | 112.7   | ±3.5  | 95.9      | ±5.3  | 88.4       | ±3.0 |
| <b>300</b>            | 111.2     | ±5.3 | 83.1   | ±4.8 | 115.0  | ±9.6  | 111.5   | ±6.1  | 75.0      | ±9.8  | 75.9       | ±3.1 |
| <b>500</b>            | 115.0     | ±9.6 | 68.5   | ±3.1 | 122.1  | ±10.1 | 111.8   | ±14.8 | 45.5      | ±14.2 | 55.0       | ±5.2 |

| Compound 3d           |           |       |        |      |        |       |         |      |           |      |            |      |
|-----------------------|-----------|-------|--------|------|--------|-------|---------|------|-----------|------|------------|------|
| Concentration<br>[μM] | Cell line |       |        |      |        |       |         |      |           |      |            |      |
|                       | BJ        |       | Caco-2 |      | PANC-1 |       | U118-MG |      | SK-MEL-30 |      | MDA-MB-231 |      |
| <b>C</b>              | 100.0     | ±9.3  | 100.0  | ±8.7 | 100.0  | ±9.3  | 100.0   | ±9.0 | 100.0     | ±6.9 | 100.0      | ±4.1 |
| <b>10</b>             | 109.1     | ±11.5 | 88.8   | ±6.9 | 107.3  | ±13.6 | 118.0   | ±5.7 | 97.2      | ±3.6 | 92.8       | ±6.1 |
| <b>20</b>             | 105.5     | ±5.5  | 82.8   | ±3.2 | 103.4  | ±10.0 | 111.1   | ±5.7 | 97.1      | ±1.7 | 91.2       | ±6.3 |
| <b>50</b>             | 108.7     | ±9.0  | 90.8   | ±5.5 | 105.4  | ±9.2  | 114.3   | ±5.0 | 97.7      | ±2.6 | 95.5       | ±2.3 |
| <b>100</b>            | 110.0     | ±3.6  | 83.1   | ±3.1 | 116.0  | ±9.7  | 111.9   | ±4.4 | 101.5     | ±2.8 | 94.4       | ±2.4 |
| <b>200</b>            | 116.0     | ±4.7  | 84.8   | ±4.1 | 112.9  | ±5.2  | 113.7   | ±3.9 | 92.3      | ±4.2 | 86.6       | ±1.9 |
| <b>300</b>            | 118.1     | ±5.3  | 85.3   | ±3.8 | 118.8  | ±10.1 | 115.1   | ±1.9 | 78.2      | ±2.1 | 81.8       | ±1.7 |
| <b>500</b>            | 117.6     | ±14.6 | 70.1   | ±4.6 | 117.8  | ±18.0 | 120.0   | ±4.6 | 59.4      | ±6.6 | 57.6       | ±3.0 |

| Compound 3e           |           |       |        |       |        |       |         |       |           |      |            |      |
|-----------------------|-----------|-------|--------|-------|--------|-------|---------|-------|-----------|------|------------|------|
| Concentration<br>[μM] | Cell line |       |        |       |        |       |         |       |           |      |            |      |
|                       | BJ        |       | Caco-2 |       | PANC-1 |       | U118-MG |       | SK-MEL-30 |      | MDA-MB-231 |      |
| <b>C</b>              | 100.0     | ±12.1 | 100.0  | ±13.1 | 100.0  | ±12.1 | 100.0   | ±10.3 | 100.0     | ±3.5 | 100.0      | ±4.0 |
| <b>10</b>             | 107.2     | ±10.5 | 99.9   | ±4.6  | 110.0  | ±4.5  | 110.1   | ±2.7  | 101.5     | ±7.3 | 96.3       | ±1.5 |
| <b>20</b>             | 109.2     | ±8.5  | 86.5   | ±2.8  | 100.9  | ±8.5  | 109.5   | ±4.0  | 100.3     | ±3.5 | 100.1      | ±2.4 |
| <b>50</b>             | 111.5     | ±8.7  | 86.7   | ±3.0  | 109.7  | ±4.3  | 115.6   | ±3.8  | 103.0     | ±2.7 | 103.1      | ±2.5 |
| <b>100</b>            | 114.0     | ±6.5  | 83.4   | ±3.7  | 111.7  | ±6.4  | 111.0   | ±5.2  | 106.0     | ±3.3 | 95.7       | ±4.5 |
| <b>200</b>            | 117.3     | ±6.4  | 80.2   | ±2.9  | 120.5  | ±6.9  | 111.7   | ±6.5  | 106.3     | ±1.7 | 93.7       | ±2.8 |
| <b>300</b>            | 118.8     | ±6.1  | 75.6   | ±2.6  | 122.2  | ±8.6  | 108.7   | ±8.8  | 104.1     | ±2.8 | 90.6       | ±2.5 |
| <b>500</b>            | 108.2     | ±11.2 | 64.1   | ±2.6  | 127.1  | ±16.2 | 106.5   | ±12.1 | 103.9     | ±2.9 | 85.2       | ±3.7 |

| Compound 3f           |           |       |        |      |        |       |         |       |           |      |            |      |
|-----------------------|-----------|-------|--------|------|--------|-------|---------|-------|-----------|------|------------|------|
| Concentration<br>[μM] | Cell line |       |        |      |        |       |         |       |           |      |            |      |
|                       | BJ        |       | Caco-2 |      | PANC-1 |       | U118-MG |       | SK-MEL-30 |      | MDA-MB-231 |      |
| <b>C</b>              | 100.0     | ±6.9  | 100.0  | ±7.5 | 100.0  | ±14.3 | 100.0   | ±11.3 | 100.0     | ±5.5 | 100.0      | ±4.4 |
| <b>10</b>             | 106.6     | ±11.8 | 91.3   | ±5.8 | 110.2  | ±5.5  | 115.8   | ±7.1  | 96.1      | ±4.9 | 96.2       | ±2.6 |
| <b>20</b>             | 102.3     | ±14.0 | 90.4   | ±2.6 | 102.3  | ±9.7  | 114.0   | ±8.8  | 98.2      | ±6.3 | 100.5      | ±1.5 |
| <b>50</b>             | 102.5     | ±4.7  | 93.7   | ±4.8 | 117.2  | ±10.4 | 114.3   | ±6.7  | 99.7      | ±3.7 | 95.3       | ±4.7 |
| <b>100</b>            | 105.6     | ±6.0  | 87.4   | ±3.7 | 116.7  | ±13.8 | 115.2   | ±7.2  | 100.2     | ±3.2 | 95.9       | ±2.9 |
| <b>200</b>            | 105.0     | ±5.6  | 89.7   | ±2.9 | 136.6  | ±12.5 | 110.1   | ±4.9  | 93.8      | ±5.2 | 87.8       | ±2.7 |
| <b>300</b>            | 105.6     | ±2.6  | 87.1   | ±3.4 | 141.0  | ±13.6 | 105.9   | ±2.4  | 73.2      | ±7.0 | 79.1       | ±3.2 |
| <b>500</b>            | 96.8      | ±10.4 | 75.2   | ±2.0 | 141.0  | ±13.9 | 86.8    | ±7.1  | 50.0      | ±2.2 | 78.2       | ±5.2 |

| Compound 3g           |           |      |        |       |        |       |         |       |           |       |            |      |
|-----------------------|-----------|------|--------|-------|--------|-------|---------|-------|-----------|-------|------------|------|
| Concentration<br>[μM] | Cell line |      |        |       |        |       |         |       |           |       |            |      |
|                       | BJ        |      | Caco-2 |       | PANC-1 |       | U118-MG |       | SK-MEL-30 |       | MDA-MB-231 |      |
| <b>C</b>              | 100.0     | ±9.5 | 100.0  | ±10.4 | 100.0  | ±11.9 | 100.0   | ±13.2 | 100.0     | ±4.5  | 100.0      | ±4.2 |
| <b>10</b>             | 99.7      | ±6.3 | 91.9   | ±3.9  | 115.6  | ±10.7 | 114.4   | ±12.2 | 95.4      | ±14.5 | 92.9       | ±2.4 |
| <b>20</b>             | 97.8      | ±5.4 | 88.8   | ±3.5  | 121.7  | ±20.6 | 109.8   | ±9.5  | 97.5      | ±10.0 | 93.6       | ±2.7 |
| <b>50</b>             | 90.8      | ±3.6 | 87.3   | ±3.8  | 144.9  | ±41.3 | 104.9   | ±6.6  | 98.3      | ±12.8 | 84.6       | ±5.2 |
| <b>100</b>            | 88.1      | ±5.1 | 80.7   | ±4.3  | 139.2  | ±48.7 | 103.5   | ±2.2  | 93.1      | ±18.8 | 82.0       | ±1.4 |
| <b>200</b>            | 84.2      | ±9.8 | 56.3   | ±6.8  | 94.1   | ±24.8 | 87.3    | ±5.2  | 71.5      | ±9.7  | 61.4       | ±2.2 |
| <b>300</b>            | 57.3      | ±5.5 | 30.1   | ±5.7  | 57.9   | ±6.6  | 40.6    | ±7.1  | 29.7      | ±2.0  | 43.9       | ±0.4 |
| <b>500</b>            | 55.4      | ±7.9 | 30.9   | ±7.2  | 57.2   | ±7.1  | 32.3    | ±2.2  | 25.2      | ±2.2  | 38.0       | ±1.5 |

| Compound 3h           |           |       |        |      |        |       |         |       |           |       |            |      |
|-----------------------|-----------|-------|--------|------|--------|-------|---------|-------|-----------|-------|------------|------|
| Concentration<br>[μM] | Cell line |       |        |      |        |       |         |       |           |       |            |      |
|                       | BJ        |       | Caco-2 |      | PANC-1 |       | U118-MG |       | SK-MEL-30 |       | MDA-MB-231 |      |
| <b>C</b>              | 100.0     | ±7.6  | 100.0  | ±9.6 | 100.0  | ±8.0  | 100.0   | ±10.1 | 100.0     | ±6.6  | 100.0      | ±5.2 |
| <b>10</b>             | 108.2     | ±9.4  | 96.3   | ±4.1 | 101.6  | ±8.6  | 111.1   | ±7.0  | 96.1      | ±11.4 | 91.6       | ±4.5 |
| <b>20</b>             | 106.3     | ±8.5  | 94.2   | ±5.5 | 96.0   | ±6.8  | 111.3   | ±7.7  | 100.4     | ±9.8  | 92.7       | ±4.6 |
| <b>50</b>             | 111.0     | ±4.0  | 99.9   | ±3.3 | 105.1  | ±6.0  | 116.3   | ±5.5  | 102.1     | ±11.6 | 92.1       | ±3.1 |
| <b>100</b>            | 118.0     | ±10.2 | 96.2   | ±4.0 | 108.6  | ±8.3  | 116.2   | ±4.5  | 105.0     | ±11.5 | 93.5       | ±3.5 |
| <b>200</b>            | 121.9     | ±12.5 | 95.6   | ±4.9 | 116.6  | ±8.6  | 121.3   | ±2.3  | 109.1     | ±9.5  | 77.1       | ±4.5 |
| <b>300</b>            | 115.1     | ±20.8 | 82.6   | ±4.8 | 127.0  | ±12.6 | 121.1   | ±5.9  | 106.1     | ±6.6  | 64.6       | ±4.1 |
| <b>500</b>            | 79.0      | ±35.6 | 65.5   | ±4.8 | 98.4   | ±21.4 | 99.9    | ±10.9 | 80.8      | ±10.8 | 45.6       | ±2.4 |

| Compound 3i           |           |      |        |      |        |       |         |      |           |       |            |      |
|-----------------------|-----------|------|--------|------|--------|-------|---------|------|-----------|-------|------------|------|
| Concentration<br>[μM] | Cell line |      |        |      |        |       |         |      |           |       |            |      |
|                       | BJ        |      | Caco-2 |      | PANC-1 |       | U118-MG |      | SK-MEL-30 |       | MDA-MB-231 |      |
| <b>C</b>              | 100.0     | ±9.9 | 100.0  | ±8.9 | 100.0  | ±7.7  | 100.0   | ±9.0 | 100.0     | ±3.9  | 100.0      | ±4.2 |
| <b>10</b>             | 102.4     | ±7.8 | 92.2   | ±4.7 | 95.4   | ±8.0  | 107.1   | ±3.6 | 88.1      | ±12.7 | 87.2       | ±2.6 |
| <b>20</b>             | 103.7     | ±9.0 | 91.2   | ±4.0 | 93.3   | ±6.8  | 108.1   | ±3.7 | 94.0      | ±7.6  | 91.2       | ±1.4 |
| <b>50</b>             | 104.7     | ±8.1 | 92.9   | ±5.4 | 97.3   | ±6.7  | 110.9   | ±4.5 | 97.3      | ±6.5  | 89.6       | ±1.6 |
| <b>100</b>            | 110.8     | ±7.2 | 82.5   | ±3.0 | 91.4   | ±12.1 | 108.6   | ±4.4 | 99.0      | ±3.6  | 85.1       | ±3.3 |
| <b>200</b>            | 115.7     | ±5.3 | 77.5   | ±3.1 | 91.2   | ±26.0 | 112.5   | ±2.8 | 100.7     | ±4.3  | 72.5       | ±9.1 |
| <b>300</b>            | 121.0     | ±3.9 | 69.8   | ±5.3 | 79.7   | ±26.9 | 109.4   | ±3.7 | 102.0     | ±4.3  | 69.3       | ±4.7 |
| <b>500</b>            | 115.4     | ±5.7 | 61.5   | ±2.4 | 66.6   | ±23.7 | 107.5   | ±3.7 | 103.1     | ±4.8  | 58.7       | ±4.6 |
